# Supplementary material for: Theoretical studies on the regioselectivity of polar vinyl monomer insertion catalyzed by an α-diimine Pd(ii) complex
Source: Royal Society of Chemistry journal article supplement (doi:10.1039/d4nj02946a), 2024-01-01
Supplement: d4nj02946a2.pdf [file d4nj02946a2.pdf]

## Supporting Information

### Theoretical study on regioselectivity of functionalized Vinyl Monomers

#### insertion catalyzed by $\alpha$ -diimine Pd(II) complex

Kaipai Ren,<sup>a</sup> Xin Wen,<sup>a</sup> Yanfeng Jiang,<sup>d</sup> Xiaohui Kang,<sup>b,\*</sup> Yi Luo<sup>c,\*</sup>

<sup>a</sup> State Key Laboratory of Fine Chemicals, School of Chemical Engineering, Dalian University of Technology, Dalian 116024, China.

<sup>b</sup> College of Pharmacy, Dalian Medical University, Dalian, Liaoning 116044, China.

<sup>c</sup> PetroChina Petrochemical Research Institute, Beijing 102206, China.

<sup>d</sup> Daqing Petrochemical Research Center, Petrochemical Research Institute of PetroChina, Daqing 163714, China.

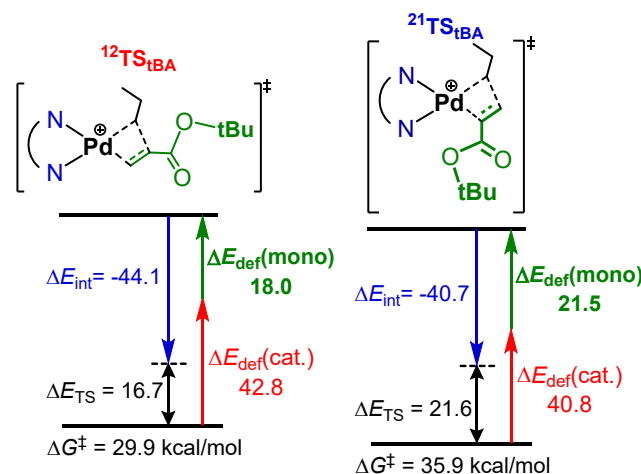

**Figure S1.** Distortion-interaction analysis of <sup>t</sup>BA monomer insertion transition state catalyzed by the DBB-Ipty Pd(II) complex. Energies are given in kcal/mol.

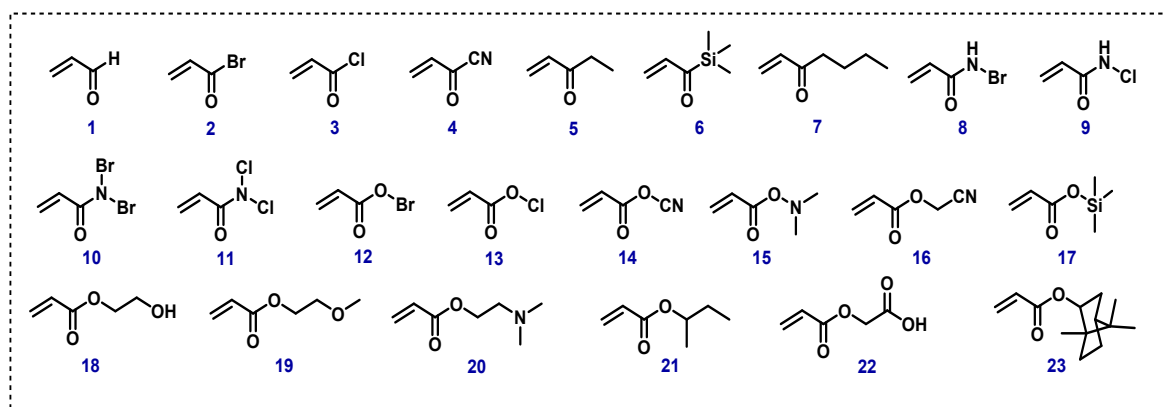

**Figure S2.** Structures of 23 PVMs used for modeling.

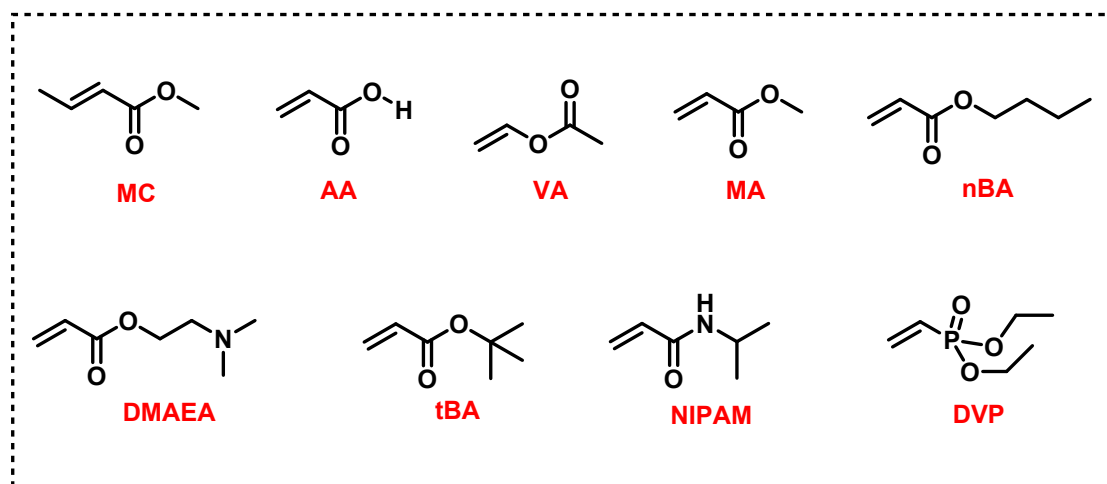

**Figure S3.** Structures of 9 PVMs for external verification.

**Table S1.** 23 PVMs descriptor data and  $\Delta\Delta G^\ddagger$  (kcal/mol) used for modeling.

| NO. | %V <sub>bur</sub> | <i>E</i> (HOMO) | <i>E</i> (LUMO) | NMR <sub>C1</sub> | NMR <sub>C2</sub> | NBO <sub>C1</sub> | NBO <sub>C2</sub> | $\Delta\Delta G^\ddagger$ |
|-----|-------------------|-----------------|-----------------|-------------------|-------------------|-------------------|-------------------|---------------------------|
| 1   | 37.7              | -0.262          | -0.074          | 47.121            | 44.064            | -0.255            | -0.317            | -0.196                    |
| 2   | 51.3              | -0.289          | -0.095          | 38.226            | 42.223            | -0.214            | -0.342            | 2.738                     |
| 3   | 49.7              | -0.306          | -0.089          | 38.497            | 43.610            | -0.224            | -0.336            | 2.209                     |
| 4   | 49.0              | -0.305          | -0.116          | 39.019            | 43.775            | -0.218            | -0.305            | 1.519                     |
| 5   | 52.6              | -0.253          | -0.060          | 49.343            | 44.186            | -0.266            | -0.310            | 5.128                     |
| 6   | 61.7              | -0.228          | -0.071          | 54.905            | 43.953            | -0.265            | -0.309            | 8.661                     |
| 7   | 52.7              | -0.252          | -0.060          | 49.418            | 44.032            | -0.266            | -0.309            | 5.395                     |
| 8   | 51.2              | -0.269          | -0.102          | 41.787            | 54.037            | -0.251            | -0.321            | 3.181                     |
| 9   | 50.7              | -0.268          | -0.069          | 42.025            | 54.988            | -0.252            | -0.324            | 2.666                     |
| 10  | 60.3              | -0.283          | -0.138          | 33.956            | 52.881            | -0.218            | -0.345            | 5.533                     |
| 11  | 58.9              | -0.286          | -0.104          | 32.703            | 53.839            | -0.217            | -0.347            | 4.857                     |
| 12  | 51.8              | -0.298          | -0.134          | 40.526            | 54.956            | -0.256            | -0.313            | 5.040                     |
| 13  | 51.1              | -0.302          | -0.102          | 39.560            | 54.926            | -0.249            | -0.321            | 4.054                     |
| 14  | 50.6              | -0.317          | -0.093          | 31.940            | 55.066            | -0.216            | -0.339            | 1.844                     |
| 15  | 54.0              | -0.244          | -0.052          | 45.056            | 49.626            | -0.273            | -0.314            | 5.834                     |
| 16  | 51.2              | -0.299          | -0.066          | 40.742            | 50.676            | -0.254            | -0.318            | 3.788                     |
| 17  | 57.3              | -0.278          | -0.054          | 43.692            | 46.935            | -0.271            | -0.311            | 8.750                     |
| 18  | 51.2              | -0.278          | -0.053          | 44.306            | 44.306            | -0.271            | -0.313            | 5.720                     |
| 19  | 51.2              | -0.263          | -0.053          | 44.255            | 48.721            | -0.270            | -0.313            | 4.256                     |
| 20  | 51.2              | -0.220          | -0.052          | 44.693            | 48.369            | -0.272            | -0.312            | 3.242                     |
| 21  | 54.2              | -0.278          | -0.050          | 45.025            | 47.543            | -0.275            | -0.309            | 3.254                     |
| 22  | 51.2              | -0.287          | -0.058          | 42.953            | 49.194            | -0.264            | -0.314            | 6.806                     |
| 23  | 54.6              | -0.276          | -0.051          | 45.163            | 47.908            | -0.274            | -0.308            | 7.070                     |

**Table S2. 9** PVMs descriptor data and  $\Delta\Delta G^\ddagger$  (kcal/mol) used for external verification.

| Mono. | %V <sub>bur</sub> | $E_{(\text{HOMO})}$ | $E_{(\text{LUMO})}$ | NMR <sub>C1</sub> | NMR <sub>C2</sub> | NBO <sub>C1</sub> | NBO <sub>C2</sub> | $\Delta\Delta G^\ddagger$ |
|-------|-------------------|---------------------|---------------------|-------------------|-------------------|-------------------|-------------------|---------------------------|
| MC    | 50.7              | -0.270              | -0.045              | 27.934            | 53.556            | -0.072            | -0.335            | -0.018                    |
| AA    | 43.4              | -0.286              | -0.057              | 41.851            | 50.976            | -0.262            | -0.326            | -0.294                    |
| VA    | 46.2              | -0.257              | -0.018              | 85.354            | 34.944            | -0.439            | 0.131             | 3.437                     |
| MA    | 50.6              | -0.281              | -0.052              | 44.797            | 48.676            | -0.272            | -0.313            | 1.519                     |
| nBA   | 51.1              | -0.279              | -0.279              | 44.992            | 48.140            | -0.274            | -0.311            | 5.72                      |
| DMAEA | 52.9              | -0.215              | -0.061              | 49.229            | 43.923            | -0.264            | -0.309            | 6.024                     |
| tBA   | 57.6              | -0.271              | -0.049              | 45.854            | 46.303            | -0.278            | -0.305            | 6.012                     |
| NIPAM | 52.1              | -0.201              | 0.031               | 101.647           | 36.787            | -0.516            | 0.026             | 7.794                     |
| DVP   | 65.6              | -0.279              | -0.027              | 46.009            | 47.273            | -0.296            | -0.581            | 9.197                     |

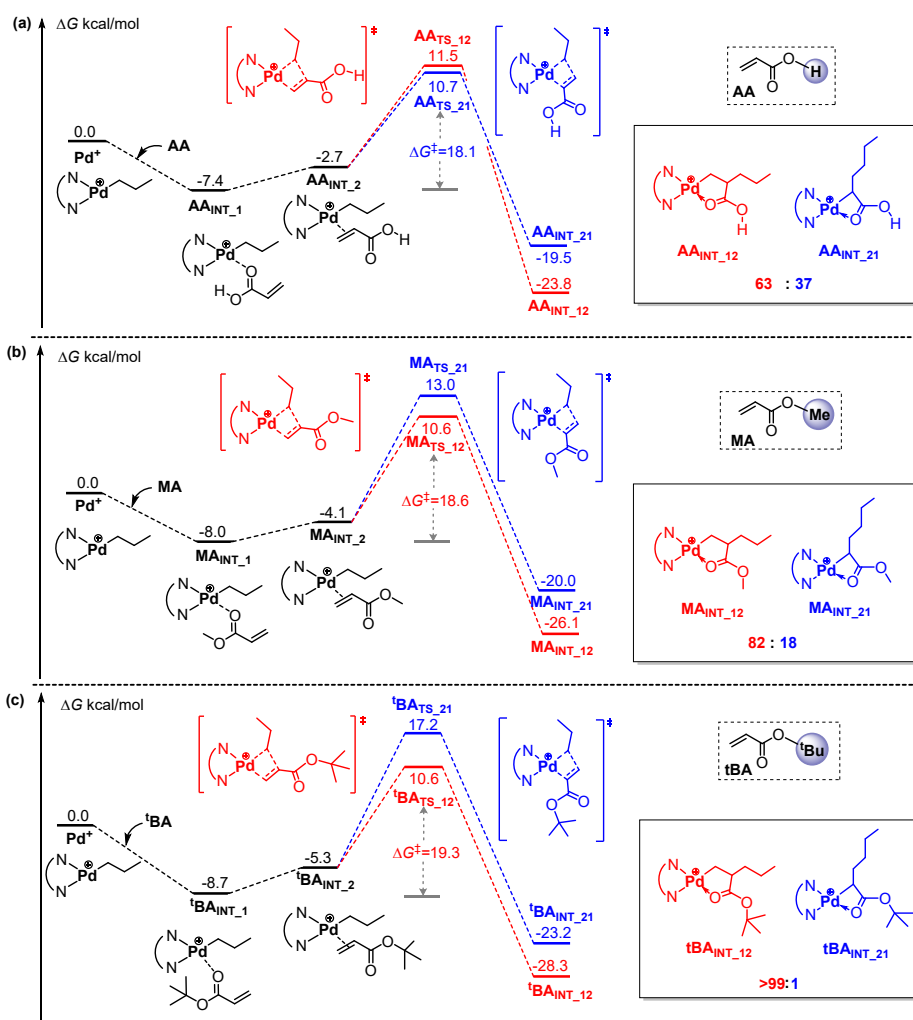

**Figure S4.** Calculated energy profiles for AA(a), MA(b), and tBA(c) insertion into the DBB-Ipty Pd(II) complex (B3LYP-D3).

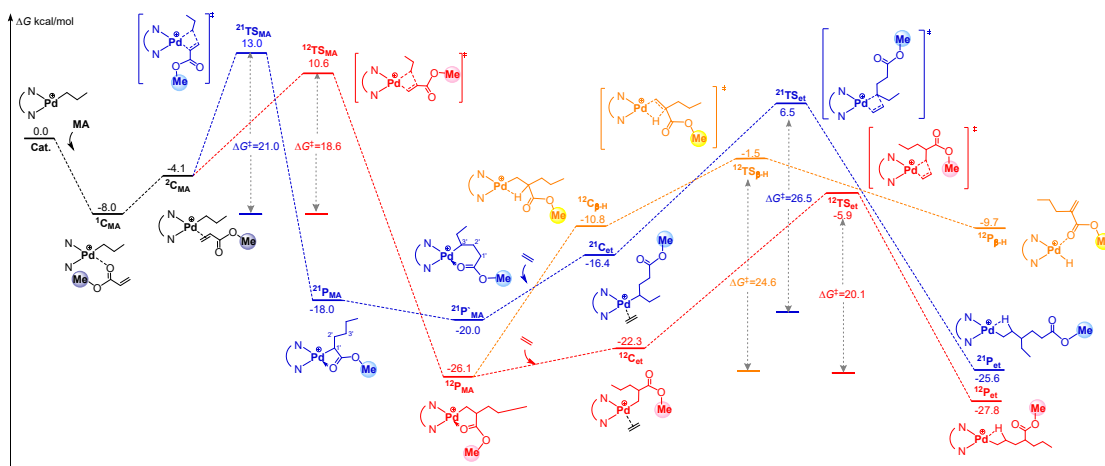

**Figure S5.** Energy profiles for ethylene insertion post-MA insertion and  $\beta$ -H elimination following MA insertion into the DBB-Ipty Pd(II) complex(B3LYP-D3).

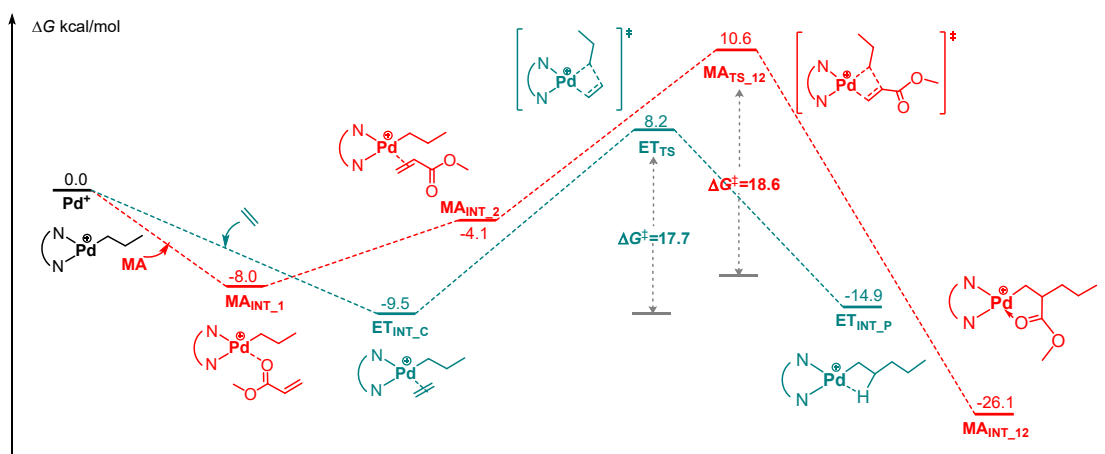

**Figure S6.** Calculated energy profiles for ethylene and MA insertion into the DBB-Ipty Pd(II) complex.
